# Supplementary material for: Preparative separation of a challenging anthocyanin from Lycium ruthenicum Murr. by two-dimensional reversed-phase liquid chromatography/hydrophilic interaction chromatography
Source: Royal Society of Chemistry journal article supplement (doi:10.1039/c5ra08713a), 2015-01-01
Supplement: c5ra08713a1.pdf [file c5ra08713a1.pdf]

**Preparative separation of a challenging anthocyanin from *Lycium  
ruthenicum* Murr. by two-dimensional reversed-phase liquid  
chromatography/hydrophilic interaction chromatography**

Hongli Jin,<sup>1,2,5</sup> Jianqiang Zhao<sup>3</sup> Weijia Zhou,<sup>1,5</sup> Aijin Shen,<sup>1,5</sup> Fan Yang,<sup>4</sup> Yanfang  
Liu,<sup>\*1</sup> Zhimou Guo,<sup>1</sup> Xiuli Zhang, <sup>\*\*1</sup> Xiaojun Peng,<sup>2</sup> Xinmiao Liang,<sup>1</sup>

<sup>1</sup>Dalian Institute of Chemical Physics, Chinese Academy of Sciences, Dalian 116023, People's  
Republic of China

<sup>2</sup>State Key Laboratory of Fine Chemicals, Dalian University of Technology, Dalian 116012,  
People's Republic of China

<sup>3</sup>Northwest Institute of Plateau Biology, Chinese Academy of Sciences, Xining 810001, People's  
Republic of China

Fax: +86-411-84379539

Tel.: +86-411-84379541

Email: liuyanfang@dicp.ac.cn

zhangxiuli@dicp.ac.cn

---

## 1. The first-dimension separation of *L. ruthenicum*

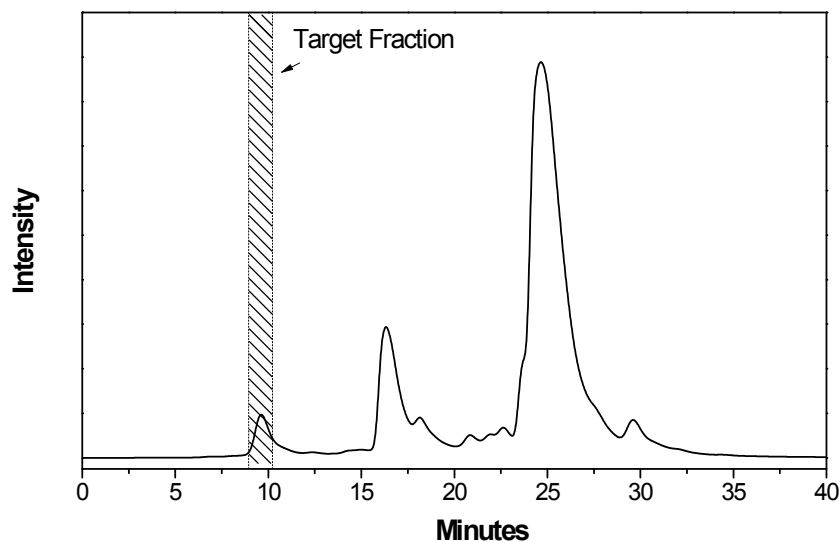

Fig. S1. The first-dimension preparation of on a prep XTerra MS C18 column

## 2. The second-dimension separation on a Click XIon column

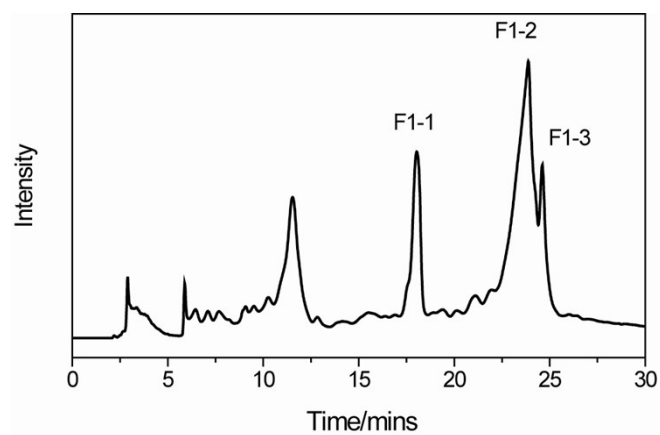

Fig. S2. The chromatogram of second-dimension preparation on the Click XIon column (20×250 mm, 10 μm). Mobile phase A: 1% v/v phosphoric acid in water and B: 1% v/v phosphoric acid in ACN; gradient: 0-30 min, 15%~35% A; flow rate: 19 mL/min; wavelength: 280 nm.

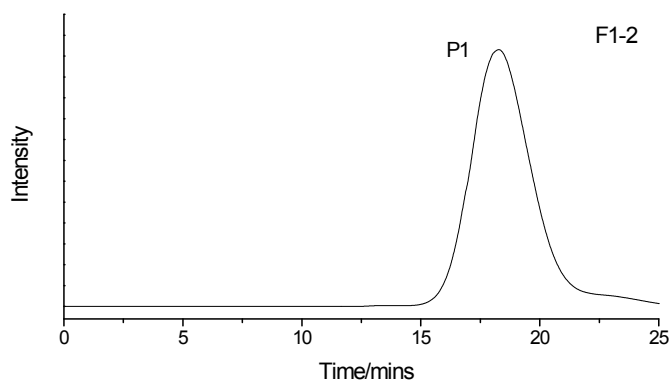

Fig. S3. The chromatogram of the preparation of F1-2 on the XCharge column (20×250 mm, 10  $\mu$ m). Mobile phase A: 5% v/v formic acid in water and B: 5% v/v formic acid in ACN; gradient: 6% B; flow rate: 19 mL/min; wavelength: 520 nm.

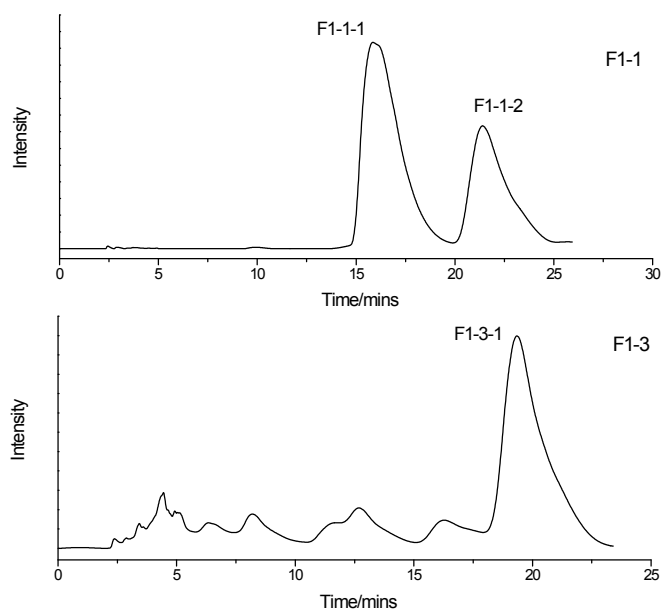

Fig. S4 The chromatogram of the preparation of F1-1 and F1-3 on the XCharge column (20×250 mm, 10  $\mu$ m). Mobile phase A: 5% v/v formic acid in water and B: 5% v/v formic acid in ACN; gradient: 6% B; flow rate: 19 mL/min; wavelength: 280 nm.

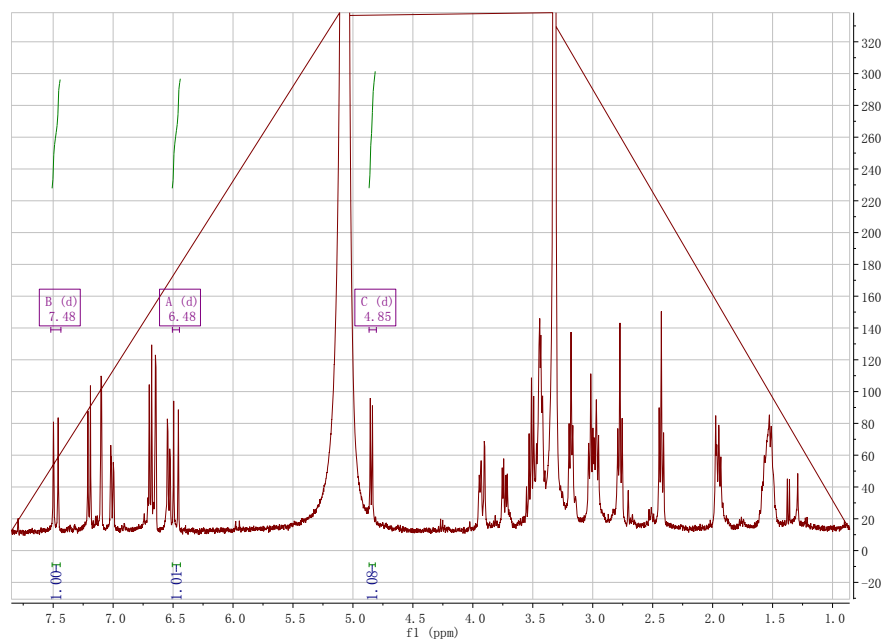

Fig. S5 <sup>1</sup>H NMR of F1-1-2

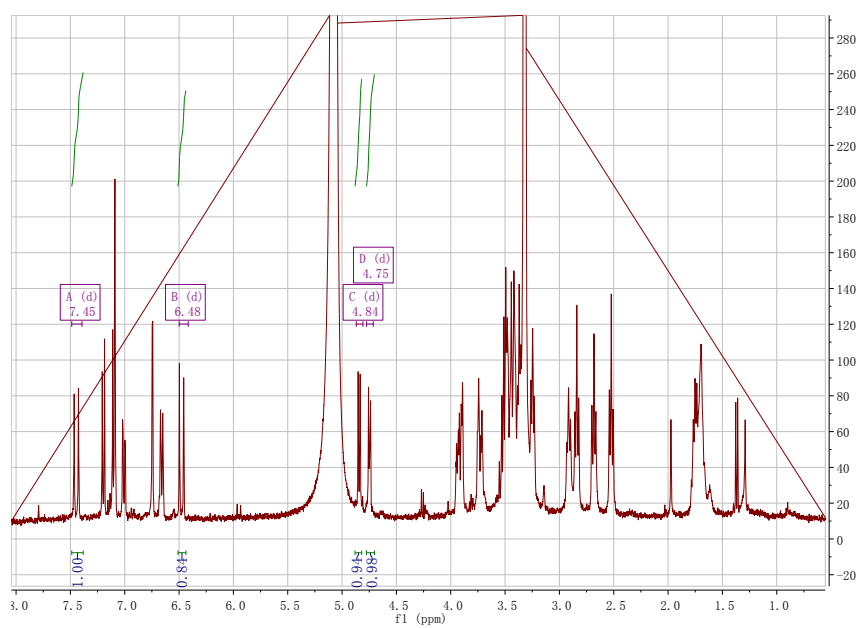

Fig. S6 <sup>1</sup>H NMR of F1-3-1
